# Supplementary material for: Cysteine‐Rich Angiogenic Inducer 61 Improves Prognostic Accuracy of GRACE (Global Registry of Acute Coronary Events) 2.0 Risk Score in Patients With Acute Coronary Syndromes
Source: PubMed Central journal article supplement — J Am Heart Assoc. 2021 Oct 8;10(20):e020488. doi: 10.1161/JAHA.120.020488 (PMC8751861; doi:10.1161/jaha.120.020488), 2021-10-08

# **SUPPLEMENTAL MATERIAL**

**Table S1. Baseline characteristics of ACS patients (n=1732).**

| Parameters                           | n = 1732 analyzed        | n = 436 without biomarkers | p-value |
|--------------------------------------|--------------------------|----------------------------|---------|
| <b>Age (years)</b>                   | n = 1732, 63.82 ± 12.27  | n = 436, 63.41 ± 13.10     | 0.545   |
| <b>Sex (female)</b>                  | n = 1732, 367 (21.2%)    | n = 436, 96 (22.0%)        | 0.695   |
| <b>Body weight (kg)</b>              | n = 1713, 80.33 ± 15.20  | n = 426, 80.21 ± 14.82     | 0.885   |
| Body Mass Index (kg/m <sup>2</sup> ) | n = 1711, 27.16 ± 4.35   | n = 426, 27.00 ± 4.30      | 0.476   |
| <b>Medical history</b>               |                          |                            |         |
| Diabetes mellitus                    | n = 1732, 313 (18.1%)    | n = 436, 83 (19.0%)        | 0.628   |
| Hypertension                         | n = 1732, 1018 (58.8%)   | n = 436, 250 (57.3%)       | 0.587   |
| Hypercholesterolemia                 | n = 1732, 1072 (61.9%)   | n = 434, 276 (63.6%)       | 0.543   |
| Current smoker                       | n = 1701, 674 (39.6%)    | n = 432, 187 (43.3%)       | 0.170   |
| Family history of CAD                | n = 1711, 432 (25.2%)    | n = 415, 115 (27.7%)       | 0.317   |
| Chronic kidney disease *             | n = 1728, 220 (12.7%)    | n = 434, 54 (12.4%)        | 0.936   |
| History of stroke or TIA             | n = 1732, 64 (3.7%)      | n = 436, 18 (4.1%)         | 0.674   |
| Previous myocardial infarction       | n = 1730, 266 (15.4%)    | n = 436, 60 (13.8%)        | 0.454   |
| Previous PCIs                        | n = 1731, 307 (17.7%)    | n = 436, 74 (17.0%)        | 0.778   |
| Previous CABG                        | n = 1732, 101 (5.8%)     | n = 436, 21 (4.8%)         | 0.485   |
| <b>Clinical presentation</b>         |                          |                            |         |
| Unstable angina                      | n = 1732, 69 (4.0%)      | n = 436, 25 (5.7%)         | 0.115   |
| NSTEMI                               | n = 1732, 747 (43.1%)    | n = 436, 183 (42.0%)       | 0.705   |
| STEMI                                | n = 1732, 916 (52.9%)    | n = 436, 228 (52.3%)       | 0.830   |
| <b>Index procedure</b>               |                          |                            |         |
| PCI                                  | n = 1732, 1564 (90.3%)   | n = 401, 371 (92.5%)       | 0.684   |
| Any drug-eluting stent               | n = 1633, 1229 (75.3%)   | n = 401, 293 (73.1%)       | 0.369   |
| Any bare-metal stent                 | n = 1633, 292 (17.9%)    | n = 401, 84 (20.9%)        | 0.172   |
| PTCA alone                           | n = 1633, 186 (11.4%)    | n = 401, 39 (9.7%)         | 0.375   |
| CABG                                 | n = 1633, 65 (4.0%)      | n = 401, 13 (3.2%)         | 0.563   |
| <b>Peri-procedural medications</b>   |                          |                            |         |
| Unfractionated heparin               | n = 1729, 1656 (95.8%)   | n = 435, 415 (95.4%)       | 0.693   |
| LMWH                                 | n = 1732, 82 (4.7%)      | n = 435, 34 (7.8%)         | 0.017   |
| Bivalirudin                          | n = 1732, 78 (4.5%)      | n = 435, 18 (4.1%)         | 0.796   |
| Glycoprotein IIb/IIIa antagonists    | n = 1732, 445 (25.7%)    | n = 435, 140 (32.2%)       | 0.008   |
| <b>GRACE risk score</b>              |                          |                            |         |
| <b>GRACE 1.0</b>                     |                          |                            |         |
| In-hospital                          | n = 1732, 144.17 ± 32.97 | n = 436, 143.97 ± 34.63    | 0.908   |
| Long-term                            | n = 1732, 123.20 ± 26.18 | n = 436, 122.85 ± 27.33    | 0.803   |
| <b>GRACE 2.0 *</b>                   |                          |                            |         |
| In-hospital death (%)                | n = 1732, 6.39 ± 8.60    | -                          | -       |
| In-hospital death/MI (%)             | n = 1732, 18.26 ± 8.70   | -                          | -       |
| 1-year death (%)                     | n = 1732, 13.01 ± 13.42  | -                          | -       |
| 1-year death/MI (%)                  | n = 1732, 18.29 ± 13.03  | -                          | -       |

Depicted are counts (%) or means ± SDs.

\*Based on creatinine-estimated glomerular filtration rate clearance of <60 mL/min/1.73m<sup>2</sup>, using the Modification of Diet in Renal Disease (MDRD) formula.

CABG, coronary artery bypass graft; CAD, coronary artery disease; LMWH, low-molecular weight heparin; PCI, percutaneous coronary interventions; TIA, transient ischemic attack.

+ GRACE 2.0 returns percentage probability of observing a respective event for each patient.

**Table S2. Discharge and Medication (n=1732).**

|                     | Count (%); sample size |
|---------------------|------------------------|
| <b>At Discharge</b> |                        |
| Aspirin             | 1693 (99.2%), n = 1706 |
| Clopidogrel         | 796 (46.7%), n = 1706  |
| Prasugrel           | 685 (40.2%), n = 1706  |
| Any DAPT            | 1578 (92.5%), n = 1706 |
| Statin              | 1673 (98.1%), n = 1705 |
| ACE inhibitor       | 1307 (76.7%), n = 1705 |
| Betablocker         | 1359 (79.8%), n = 1704 |
| PPI                 | 486 (28.5%), n = 1706  |
| NSAID               | 26 (1.5%), n = 1706    |
| Immunosuppressives  | 38 (2.2%), n = 1706    |
| <b>At 30 days</b>   |                        |
| Aspirin             | 1645 (98.1%), n = 1677 |
| Clopidogrel         | 795 (47.4%), n = 1676  |
| Prasugrel           | 651 (38.8%), n = 1676  |
| Any DAPT            | 1517 (90.5%), n = 1677 |
| Statin              | 1622 (96.7%), n = 1677 |
| ACE inhibitor       | 1187 (70.8%), n = 1676 |
| Betablocker         | 1399 (83.5%), n = 1676 |
| PPI                 | 460 (27.4%), n = 1677  |
| NSAID               | 23 (1.4%), n = 1677    |
| Immunosuppressives  | 31 (1.8%), n = 1677    |
| <b>At 1 year</b>    |                        |
| Aspirin             | 1534 (96.5%), n = 1590 |
| Clopidogrel         | 678 (42.6%), n = 1590  |
| Prasugrel           | 584 (36.7%), n = 1590  |
| Any DAPT            | 1315 (82.7%), n = 1590 |
| Statin              | 1484 (93.5%), n = 1588 |
| ACE inhibitor       | 922 (58.1%), n = 1588  |
| Betablocker         | 1245 (78.4%), n = 1588 |
| PPI                 | 441 (27.8%), n = 1588  |
| NSAID               | 36 (2.3%), n = 1588    |
| Immunosuppressives  | 31 (2.0%), n = 1588    |

**Table S3. Clinical outcomes (n=1732).**

| <b>Parameters</b>                        | <b>n = 1732</b> |
|------------------------------------------|-----------------|
| <b>At 30 days</b>                        |                 |
| Death                                    | 32 (1.8%)       |
| Cardiac death                            | 29 (1.7%)       |
| Myocardial infarction                    | 27 (1.6%)       |
| Revascularization (any)                  | 35 (2.0%)       |
| Revascularization (clinically indicated) | 32 (1.8%)       |
| Cerebrovascular events (Stroke and TIA)  | 14 (0.8%)       |
| Stroke (any)                             | 12 (0.7%)       |
| CVE (Ischemic stroke)                    | 11 (0.6%)       |
| CVE (Intracerebral hemorrhage)           | 0 (0.0%)        |
| CVE (Unclear etiology)                   | 1 (0.1%)        |
| TIA                                      | 2 (0.1%)        |
| Stent thrombosis (definite)              | 15 (0.9%)       |
| All-cause death or MI                    | 58 (3.3%)       |
| <b>At 1 year</b>                         |                 |
| Death                                    | 72 (4.2%)       |
| Cardiac death                            | 57 (3.3%)       |
| Myocardial infarction                    | 64 (3.7%)       |
| Revascularization                        | 111 (6.4%)      |
| Revascularization (clinically indicated) | 104 (6.0%)      |
| Cerebrovascular events (Stroke and TIA)  | 32 (1.8%)       |
| Stroke (any)                             | 26 (1.5%)       |
| CVE (Ischemic stroke)                    | 23 (1.3%)       |
| CVE (Intracerebral hemorrhage)           | 2 (0.1%)        |
| CVE (Unclear etiology)                   | 1 (0.1%)        |
| TIA                                      | 7 (0.4%)        |
| Stent thrombosis (definite)              | 19 (1.1%)       |
| All-cause death or MI                    | 129 (7.4%)      |

**Table S4. Univariable Cox models for GRACE risk score (version 1.0 and 2.0), CCN1, hsTnT, NT-proBNP, and, hsCRP for 30-days and 1-year follow-up to predict all-cause mortality and all-cause mortality/myocardial infarction (n=1732).**

|                                               | Hazard ratio      | p-value |
|-----------------------------------------------|-------------------|---------|
| <b>30-day all-cause mortality</b>             |                   |         |
| In-hospital GRACE risk score 1.0 <sup>1</sup> | 1.30 (1.20, 1.40) | <0.001  |
| In-hospital GRACE risk score 2.0 <sup>2</sup> | 4.24 (3.02, 5.95) | <0.001  |
| CCN1 (ng/l)                                   | 2.63 (2.05, 3.38) | <0.001  |
| hsTnT (µg/l)                                  | 1.91 (1.49, 2.44) | <0.001  |
| NT-proBNP (ng/l)                              | 1.83 (1.47, 2.28) | <0.001  |
| hsCRP (mg/l)                                  | 1.44 (1.16, 1.78) | <0.001  |
| <b>30-day all-cause mortality/MI</b>          |                   |         |
| In-hospital GRACE risk score 1.0 <sup>1</sup> | 1.20 (1.20, 1.30) | <0.001  |
| In-hospital GRACE risk score 2.0 <sup>2</sup> | 4.26 (2.42, 7.49) | <0.001  |
| CCN1 (ng/l)                                   | 1.95 (1.56, 2.43) | <0.001  |
| hsTnT (µg/l)                                  | 1.29 (1.10, 1.52) | 0.002   |
| NT-proBNP (ng/l)                              | 1.43 (1.23, 1.68) | <0.001  |
| hsCRP (mg/l)                                  | 1.31 (1.12, 1.54) | 0.001   |
| <b>1-year all-cause mortality</b>             |                   |         |
| Long-term GRACE risk score 1.0 <sup>1</sup>   | 1.40 (1.30, 1.50) | <0.001  |
| 1-year GRACE risk score 2.0 <sup>2</sup>      | 4.29 (3.22, 5.71) | <0.001  |
| CCN1 (ng/l)                                   | 1.98 (1.61, 2.43) | <0.001  |
| hsTnT (µg/l)                                  | 1.42 (1.22, 1.65) | <0.001  |
| NT-proBNP (ng/l)                              | 1.86 (1.60, 2.15) | <0.001  |
| hsCRP (mg/l)                                  | 1.50 (1.30, 1.73) | <0.001  |
| <b>1-year all-cause mortality/MI</b>          |                   |         |
| Long-term GRACE risk score 1.0 <sup>1</sup>   | 1.30 (1.20, 1.30) | <0.001  |
| 1-year GRACE risk score 2.0 <sup>2</sup>      | 3.48 (2.65, 4.57) | <0.001  |
| CCN1 (ng/l)                                   | 1.57 (1.32, 1.87) | <0.001  |
| hsTnT (µg/l)                                  | 1.18 (1.06, 1.31) | 0.002   |
| NT-proBNP (ng/l)                              | 1.53 (1.37, 1.70) | <0.001  |
| hsCRP (mg/l)                                  | 1.38 (1.24, 1.54) | <0.001  |

<sup>1</sup> We used continuous GRACE 1.0 scores, and HRs were reported per 10 score unit increase.

<sup>2</sup> For GRACE 2.0 scores, and the biomarkers, natural logarithm was used, and HRs were reported per one log-unit increase.

**Table S5. Results of the multivariable Cox models using bootstrapping for GRACE risk score (version 1.0 and 2.0), CCN1, hsTnT, NT-proBNP, and, hsCRP for 30-days and 1-year follow-up to predict all-cause mortality and all-cause mortality/myocardial infarction (n=1732).**

| <b>30 days all-cause mortality</b>    | <b>GRACE 1.0<sup>1</sup></b> |                | <b>GRACE 2.0<sup>2</sup></b> |                |
|---------------------------------------|------------------------------|----------------|------------------------------|----------------|
|                                       | <b>Hazard ratio</b>          | <b>p-value</b> | <b>Hazard ratio</b>          | <b>p-value</b> |
| In-hospital GRACE                     | 1.20 (1.10, 1.30)            | <0.001         | 2.59 (1.70, 3.95)            | <0.001         |
| CCN1 (ng/l)                           | 1.77 (1.23, 2.55)            | 0.002          | 1.67 (1.11, 2.52)            | 0.014          |
| hsTnT (µg/l)                          | 1.46 (1.09, 1.95)            | 0.010          | 1.47 (1.11, 1.95)            | 0.008          |
| NT-proBNP (ng/l)                      | 1.11 (0.88, 1.41)            | 0.377          | 1.15 (0.90, 1.46)            | 0.264          |
| hsCRP (mg/l)                          | 1.05 (0.75, 1.48)            | 0.761          | 1.05 (0.76, 1.46)            | 0.767          |
| <b>30 days all-cause mortality/MI</b> |                              |                |                              |                |
| In-hospital GRACE                     | 1.10 (1.00, 1.02)            | <0.001         | 1.92 (0.95, 3.86)            | 0.067          |
| CCN1 (ng/l)                           | 1.65 (1.26, 2.15)            | <0.001         | 1.73 (1.32, 2.27)            | <0.001         |
| hsTnT (µg/l)                          | 1.04 (0.84, 1.30)            | 0.712          | 1.02 (0.83, 1.27)            | 0.834          |
| NT-proBNP (ng/l)                      | 1.14 (0.96, 1.36)            | 0.133          | 1.24 (1.06, 1.46)            | 0.009          |
| hsCRP (mg/l)                          | 1.16 (0.95, 1.43)            | 0.146          | 1.17 (0.96, 1.44)            | 0.122          |
| <b>1-year all-cause mortality</b>     |                              |                |                              |                |
| Long-term GRACE                       | 1.20 (1.10, 1.30)            | <0.001         | 2.51 (1.74, 3.64)            | <0.001         |
| CCN1 (ng/l)                           | 1.81 (1.41, 2.31)            | <0.001         | 1.51 (1.13, 2.03)            | 0.006          |
| hsTnT (µg/l)                          | 1.03 (0.86, 1.25)            | 0.731          | 1.04 (0.86, 1.25)            | 0.685          |
| NT-proBNP (ng/l)                      | 1.25 (1.02, 1.54)            | 0.030          | 1.25 (1.03, 1.51)            | 0.021          |
| hsCRP (mg/l)                          | 1.23 (1.03, 1.48)            | 0.025          | 1.17 (0.98, 1.41)            | 0.088          |
| <b>1-year all-cause mortality/MI</b>  |                              |                |                              |                |
| Long-term GRACE                       | 1.10 (1.10, 1.20)            | <0.001         | 1.98 (1.40, 2.80)            | <0.001         |
| CCN1 (ng/l)                           | 1.58 (1.31, 1.91)            | <0.001         | 1.43 (1.16, 1.76)            | <0.001         |
| hsTnT (µg/l)                          | 0.92 (0.81, 1.05)            | 0.209          | 0.92 (0.80, 1.04)            | 0.183          |
| NT-proBNP (ng/l)                      | 1.24 (1.07, 1.43)            | 0.004          | 1.26 (1.10, 1.44)            | <0.001         |
| hsCRP (mg/l)                          | 1.26 (1.11, 1.43)            | <0.001         | 1.23 (1.08, 1.40)            | 0.002          |

<sup>1</sup> We used continuous GRACE 1.0 scores, and HRs were reported per 10 score unit increase.

<sup>2</sup> For GRACE 2.0 scores, and the biomarkers, natural logarithm was used, and HRs were reported per one log-unit increase.

**Table S6. Subgroup analysis NSTEMI: Accuracy of risk prediction for all-cause mortality (n= 816).**

| 30-day all-cause mortality               | GRACE 1.0 <sup>1</sup> |         | GRACE 2.0 <sup>2</sup> |         |
|------------------------------------------|------------------------|---------|------------------------|---------|
|                                          | C-statistic            | p-value | C-statistic            | p-value |
| In-hospital GRACE                        | 0.881                  |         | 0.885                  |         |
| GRACE + CCN1                             | 0.902                  | <0.001  | 0.918                  | <0.001  |
| GRACE + hsTnT                            | 0.892                  | 0.022   | 0.909                  | 0.007   |
| GRACE + NT-proBNP                        | 0.888                  | 0.589   | 0.893                  | 0.707   |
| GRACE + hsCRP                            | 0.884                  | 0.033   | 0.887                  | 0.0432  |
| GRACE + CCN1 + hsTnT                     | 0.904                  | <0.001  | 0.917                  | <0.001  |
| GRACE + CCN1 + hsTnT + NT-proBNP         | 0.904                  | <0.001  | 0.917                  | <0.001  |
| GRACE + CCN1 + hsTnT + NT-proBNP + hsCRP | 0.903                  | <0.001  | 0.914                  | <0.001  |
| <b>1-year all-cause mortality</b>        |                        |         |                        |         |
| Long-term GRACE                          | 0.798                  |         | 0.826                  |         |
| GRACE + CCN1                             | 0.845                  | <0.001  | 0.847                  | 0.0002  |
| GRACE + hsTnT                            | 0.807                  | 0.148   | 0.826                  | 0.118   |
| GRACE + NT-proBNP                        | 0.802                  | 0.018   | 0.829                  | 0.128   |
| GRACE + hsCRP                            | 0.799                  | 0.360   | 0.827                  | 0.686   |
| GRACE + CCN1 + hsTnT                     | 0.843                  | <0.001  | 0.843                  | <0.001  |
| GRACE + CCN1 + hsTnT + NT-proBNP         | 0.849                  | <0.001  | 0.847                  | <0.001  |
| GRACE + CCN1 + hsTnT + NT-proBNP + hsCRP | 0.849                  | <0.001  | 0.848                  | <0.001  |

<sup>1</sup>We used continuous GRACE 1.0 scores.

<sup>2</sup> For GRACE 2.0 scores and the biomarkers, a natural logarithm was used.

**Table S7. Subgroup analysis NSTEMI: Integrated discrimination index (IDI) for all-cause mortality (n=816).**

|                                          | GRACE 1.0 <sup>1</sup> |         | GRACE 2.0 <sup>2</sup> |         |
|------------------------------------------|------------------------|---------|------------------------|---------|
|                                          | IDI value              | p-value | IDI value              | p-value |
| <b>30-day all-cause mortality</b>        |                        |         |                        |         |
| In-hospital GRACE risk score             | Reference              | -       | Reference              | -       |
| GRACE + CCN1                             | 0.160                  | 0.106   | 0.160                  | 0.089   |
| GRACE + hsTnT                            | 0.021                  | 0.011   | 0.029                  | 0.026   |
| GRACE + NT-proBNP                        | 0.001                  | 0.135   | 0.002                  | 0.376   |
| GRACE + hsCRP                            | 0.021                  | 0.264   | 0.020                  | 0.379   |
| GRACE + CCN1 + hsTnT                     | 0.168                  | 0.108   | 0.167                  | 0.113   |
| GRACE + CCN1 + hsTnT + NT-proBNP         | 0.160                  | 0.073   | 0.168                  | 0.075   |
| GRACE + CCN1 + hsTnT + NT-proBNP + hsCRP | 0.122                  | 0.132   | 0.131                  | 0.118   |
| <b>1-year all-cause mortality</b>        |                        |         |                        |         |
| Long-term GRACE risk score               | Reference              | -       | Reference              | -       |
| GRACE + CCN1                             | 0.067                  | 0.027   | 0.050                  | 0.053   |
| GRACE + hsTnT                            | 0.006                  | 0.286   | 0.013                  | 0.032   |
| GRACE + NT-proBNP                        | 0.023                  | 0.035   | 0.009                  | 0.283   |
| GRACE + hsCRP                            | 0.003                  | 0.374   | 0.001                  | 0.664   |
| GRACE + CCN1 + hsTnT                     | 0.065                  | 0.026   | 0.048                  | 0.067   |
| GRACE + CCN1 + hsTnT + NT-proBNP         | 0.070                  | 0.014   | 0.058                  | 0.028   |
| GRACE + CCN1 + hsTnT + NT-proBNP + hsCRP | 0.069                  | 0.014   | 0.057                  | 0.031   |

<sup>1</sup> We used continuous GRACE 1.0 scores.

<sup>2</sup> For GRACE 2.0 scores and the biomarkers, a natural logarithmic transformation is used.



**Table S8. Subgroup analysis STEMI: Accuracy of risk prediction for all-cause mortality (n=916).**

| 30-day all-cause mortality               | GRACE 1.0 <sup>1</sup> |         | GRACE2.0 <sup>2</sup> |         |
|------------------------------------------|------------------------|---------|-----------------------|---------|
|                                          | C-statistic            | p-value | C-statistic           | p-value |
| In-hospital GRACE risk score             | 0.853                  | -       | 0.854                 | -       |
| GRACE + CCN1                             | 0.853                  | 0.250   | 0.858                 | 0.310   |
| GRACE + hsTnT                            | 0.869                  | <0.001  | 0.869                 | <0.001  |
| GRACE + NT-proBNP                        | 0.897                  | <0.001  | 0.894                 | <0.001  |
| GRACE + hsCRP                            | 0.889                  | <0.001  | 0.894                 | <0.001  |
| GRACE + CCN1 + hsTnT                     | 0.872                  | 0.002   | 0.873                 | 0.003   |
| GRACE + CCN1 + hsTnT + NT-proBNP         | 0.897                  | <0.001  | 0.893                 | 0.001   |
| GRACE + CCN1 + hsTnT + NT-proBNP + hsCRP | 0.905                  | <0.001  | 0.906                 | <0.001  |
| <b>1-year all-cause mortality</b>        |                        |         |                       |         |
| Long-term GRACE risk score               | 0.755                  | -       | 0.805                 |         |
| GRACE + CCN1                             | 0.762                  | 0.028   | 0.803                 | 0.292   |
| GRACE + hsTnT                            | 0.772                  | 0.002   | 0.809                 | 0.015   |
| GRACE + NT-proBNP                        | 0.810                  | <0.001  | 0.830                 | 0.002   |
| GRACE + hsCRP                            | 0.794                  | <0.001  | 0.837                 | <0.001  |
| GRACE + CCN1 + hsTnT                     | 0.781                  | <0.001  | 0.807                 | 0.025   |
| GRACE + CCN1 + hsTnT + NT-proBNP         | 0.820                  | <0.001  | 0.828                 | 0.007   |
| GRACE + CCN1 + hsTnT + NT-proBNP + hsCRP | 0.828                  | <0.001  | 0.842                 | 0.002   |

<sup>1</sup> We used continuous GRACE 1.0 scores.

<sup>2</sup> For GRACE 2.0 scores and the biomarkers, a natural logarithm was used.

**Table S9. Subgroup analysis STEMI: Integrated discrimination index (IDI) for all-cause mortality (n=916).**

| 30-day all-cause mortality               | GRACE 1.0 <sup>1</sup> |         | GRACE 2.0 <sup>2</sup> |         |
|------------------------------------------|------------------------|---------|------------------------|---------|
|                                          | IDI value              | p-value | IDI value              | p-value |
| In-hospital GRACE risk score             | Reference              | -       | Reference              | -       |
| GRACE + CCN1                             | 0.005                  | 0.322   | 0.005                  | 0.336   |
| GRACE + hsTnT                            | 0.043                  | 0.004   | 0.043                  | 0.010   |
| GRACE + NT-proBNP                        | 0.039                  | 0.038   | 0.040                  | 0.061   |
| GRACE + hsCRP                            | 0.035                  | 0.071   | 0.040                  | 0.121   |
| GRACE + CCN1 + hsTnT                     | 0.006                  | 0.373   | 0.006                  | 0.386   |
| GRACE + CCN1 + hsTnT + NT-proBNP         | 0.009                  | 0.279   | 0.008                  | 0.356   |
| GRACE + CCN1 + hsTnT + NT-proBNP + hsCRP | 0.016                  | 0.159   | 0.014                  | 0.240   |
| <b>1-year all-cause mortality</b>        |                        |         |                        |         |
| Long-term GRACE risk score               | Reference              | -       | Reference              | -       |
| GRACE + CCN1                             | 0.015                  | 0.014   | 0.006                  | 0.094   |
| GRACE + hsTnT                            | 0.022                  | 0.001   | 0.018                  | 0.008   |
| GRACE + NT-proBNP                        | 0.037                  | <0.001  | 0.026                  | 0.029   |
| GRACE + hsCRP                            | 0.040                  | 0.002   | 0.030                  | 0.044   |
| GRACE + CCN1 + hsTnT                     | 0.017                  | 0.016   | 0.008                  | 0.086   |
| GRACE + CCN1 + hsTnT + NT-proBNP         | 0.016                  | 0.035   | 0.009                  | 0.096   |
| GRACE + CCN1 + hsTnT + NT-proBNP + hsCRP | 0.025                  | 0.018   | 0.015                  | 0.056   |

<sup>1</sup> We used continuous GRACE 1.0 scores.

<sup>2</sup> For GRACE 2.0 scores and the biomarkers, a natural logarithmic transformation is used.

**Table S10. Baseline characteristics for different categories of CCN1.**

| Parameters                            | Total<br>N = 1732                      | CCN1≤589.01 ng/l<br>N = 1039           | CCN1>589.01 ng/l<br>N = 693             |
|---------------------------------------|----------------------------------------|----------------------------------------|-----------------------------------------|
| Age                                   | n = 1732, 63.82 ± 12.27                | n = 1039, 63.15 ± 12.00                | n = 693, 64.82 ± 12.60                  |
| Sex (female)                          | n = 1732, 367 (21.2%)                  | n = 1039, 192 (18.5%)                  | n = 693, 175 (25.3%)                    |
| Weight                                | n = 1713, 80.33 ± 15.20                | n = 1035, 81.79 ± 15.42                | n = 678, 78.09 ± 14.58                  |
| BMI                                   | n = 1711, 27.16 ± 4.35                 | n = 1034, 27.58 ± 4.43                 | n = 677, 26.53 ± 4.14                   |
| Diabetes mellitus (yes)               | n = 1732, 313 (18.1%)                  | n = 1039, 204 (19.6%)                  | n = 693, 109 (15.7%)                    |
| Hypertension (yes)                    | n = 1732, 1018 (58.8%)                 | n = 1039, 633 (60.9%)                  | n = 693, 385 (55.6%)                    |
| Hypercholesterolemia                  | n = 1732, 1072 (61.9%)                 | n = 1039, 667 (64.2%)                  | n = 693, 405 (58.4%)                    |
| Current smoker (yes)                  | n = 1701, 674 (39.6%)                  | n = 1018, 419 (41.2%)                  | n = 683, 255 (37.3%)                    |
| Family history of CAD                 | n = 1711, 432 (25.2%)                  | n = 1031, 270 (26.2%)                  | n = 680, 162 (23.8%)                    |
| Renal failure (yes (<60 eGFR))        | n = 1728, 220 (12.7%)                  | n = 1036, 110 (10.6%)                  | n = 692, 110 (15.9%)                    |
| History of stroke or TIA (yes)        | n = 1732, 64 (3.7%)                    | n = 1039, 38 (3.7%)                    | n = 693, 26 (3.8%)                      |
| Previous MI (yes)                     | n = 1730, 266 (15.4%)                  | n = 1039, 186 (17.9%)                  | n = 691, 80 (11.6%)                     |
| Previous PCIs (yes)                   | n = 1731, 307 (17.7%)                  | n = 1039, 217 (20.9%)                  | n = 692, 90 (13.0%)                     |
| Previous CABG (yes)                   | n = 1732, 101 (5.8%)                   | n = 1039, 66 (6.4%)                    | n = 693, 35 (5.1%)                      |
| Acute coronary syndrome               | n = 1732                               | n = 1039                               | n = 693                                 |
| unstable angina                       | 69 (4.0%)                              | 62 (6.0%)                              | 7 (1.0%)                                |
| non-ST-elevation MI                   | 747 (43.1%)                            | 604 (58.1%)                            | 143 (20.6%)                             |
| ST-elevation MI                       | 916 (52.9%)                            | 373 (35.9%)                            | 543 (78.4%)                             |
| Congestive heart failure              | n = 1721                               | n = 1034                               | n = 687                                 |
| Killip I                              | 1481 (86.1%)                           | 928 (89.7%)                            | 553 (80.5%)                             |
| Killip II                             | 168 (9.8%)                             | 86 (8.3%)                              | 82 (11.9%)                              |
| Killip III                            | 32 (1.9%)                              | 16 (1.5%)                              | 16 (2.3%)                               |
| Killip IV                             | 40 (2.3%)                              | 4 (0.4%)                               | 36 (5.2%)                               |
| Systolic blood pressure               | n = 1723, 130.52 ± 23.42               | n = 1035, 131.94 ± 22.54               | n = 688, 128.39 ± 24.54                 |
| Heart rate                            | n = 1725, 75.96 ± 15.78                | n = 1035, 75.08 ± 15.32                | n = 690, 77.27 ± 16.38                  |
| Intervention performed (Yes)          | n = 1732, 1564 (90.3%)                 | n = 1039, 916 (88.2%)                  | n = 693, 648 (93.5%)                    |
| Intervention - any PCI stenting (yes) | n = 1633, 1497 (91.7%)                 | n = 963, 876 (91.0%)                   | n = 670, 621 (92.7%)                    |
| Any Drug-eluting stent (yes)          | n = 1633, 1229 (75.3%)                 | n = 963, 742 (77.1%)                   | n = 670, 487 (72.7%)                    |
| Any Bare-metal stent (yes)            | n = 1633, 292 (17.9%)                  | n = 963, 148 (15.4%)                   | n = 670, 144 (21.5%)                    |
| Intervention - any PCI balloon (yes)  | n = 1633, 186 (11.4%)                  | n = 963, 120 (12.5%)                   | n = 670, 66 (9.9%)                      |
| Intervention - any CABG (yes)         | n = 1633, 65 (4.0%)                    | n = 963, 46 (4.8%)                     | n = 670, 19 (2.8%)                      |
| Unfract. Heparin (yes)                | n = 1729, 1656 (95.8%)                 | n = 1037, 992 (95.7%)                  | n = 692, 664 (96.0%)                    |
| LMWH (yes)                            | n = 1732, 82 (4.7%)                    | n = 1039, 58 (5.6%)                    | n = 693, 24 (3.5%)                      |
| Bivalirudin (yes)                     | n = 1732, 78 (4.5%)                    | n = 1039, 44 (4.2%)                    | n = 693, 34 (4.9%)                      |
| GP IIb/IIIa (yes)                     | n = 1732, 445 (25.7%)                  | n = 1039, 213 (20.5%)                  | n = 693, 232 (33.5%)                    |
| PPI (yes)                             | n = 1721, 261 (15.2%)                  | n = 1032, 162 (15.7%)                  | n = 689, 99 (14.4%)                     |
| <b>GRACE risk scores</b>              |                                        |                                        |                                         |
| <b>GRACE 1.0</b>                      |                                        |                                        |                                         |
| In-hospital                           | n = 1732, 144.17 ± 32.97               | n = 1039, 136.96 ± 29.69               | n = 693, 154.99 ± 34.66                 |
| Long-term                             | n = 1732, 123.20 ± 26.18               | n = 1039, 122.11 ± 25.93               | n = 693, 124.85 ± 26.49                 |
| <b>GRACE 2.0</b>                      |                                        |                                        |                                         |
| In-hospital death (%)                 | n = 1732, 6.39 ± 8.60                  | n = 1039, 4.48 ± 4.91                  | n = 693, 9.25 ± 11.63                   |
| In-hospital death/MI (%)              | n = 1732, 18.26 ± 8.70                 | n = 1039, 15.41 ± 6.60                 | n = 693, 22.53 ± 9.68                   |
| 1-year death (%)                      | n = 1732, 13.01 ± 13.42                | n = 1039, 10.41 ± 9.69                 | n = 693, 16.92 ± 16.86                  |
| 1-year death/MI (%)                   | n = 1732, 18.29 ± 13.03                | n = 1039, 15.57 ± 9.74                 | n = 693, 22.35 ± 15.97                  |
| <b>Concentration of biomarkers</b>    |                                        |                                        |                                         |
| <b>Mean ± SD</b>                      |                                        |                                        |                                         |
| CCN1 (ng/l)                           | n = 1732, 992.06 ± 3803.91             | n = 1039, 362.65 ± 113.41              | n = 693, 1935.72 ± 5889.76              |
| hsTnT (µg/l)                          | n = 1732, 0.65 ± 1.29                  | n = 1039, 0.63 ± 1.14                  | n = 693, 0.67 ± 1.48                    |
| NT-proBNP (ng/l)                      | n = 1732, 1507.42 ± 3834.9             | n = 1039, 1379.80 ± 2883.91            | n = 693, 1698.76 ± 4924.52              |
| hsCRP (mg/L)                          | n = 1732, 10.71 ± 24.16                | n = 1039, 13.02 ± 27.50                | n = 693, 7.24 ± 17.47                   |
| <b>Median (IQR)</b>                   |                                        |                                        |                                         |
| CCN1 (ng/l)                           | n = 1732, 488.09<br>(334.81 to 866.78) | n = 1039, 360.05<br>(279.11 to 443.06) | n = 693, 1055.75<br>(751.61 to 1772.03) |
| hsTnT (µg/l)                          | n = 1732, 0.20 (0.06 to 0.70)          | n = 1039, 0.22 (0.06 to 0.76)          | n = 693, 0.19 (0.06 to 0.60)            |
| NT-proBNP (ng/l)                      | n = 1732, 385.5 (124 to 1320)          | n = 1039, 450 (152 to 1409)            | n = 693, 270 (88 to 1163)               |
| hsCRP (mg/L)                          | n = 1732, 2.7 (1.1 to 8.0)             | n = 1039, 3.3 (1.3 to 9.5)             | n = 693, 2.3 (1 to 5.6)                 |

Figure S1a. Kaplan-Meier curve for 30-day mortality for different categories of CCN1.

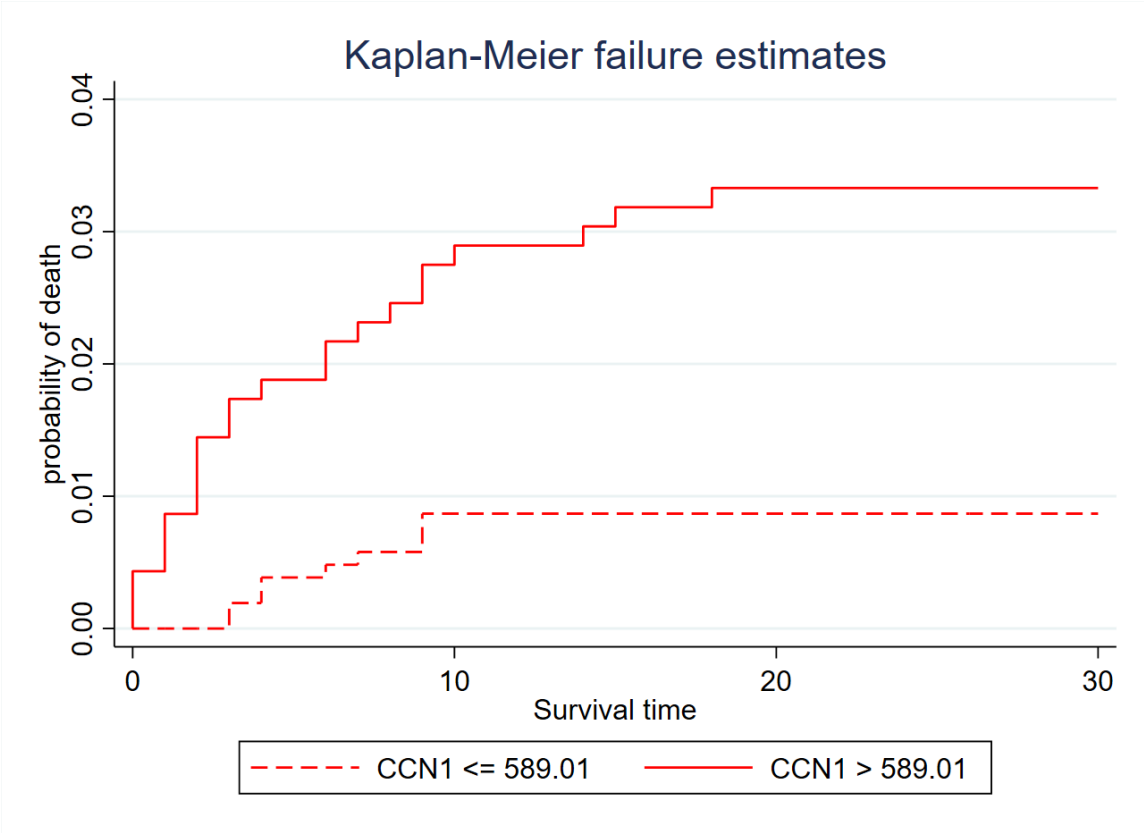

Figure S1b. Kaplan-Meier curve for 1-year mortality for different categories of CCN1.

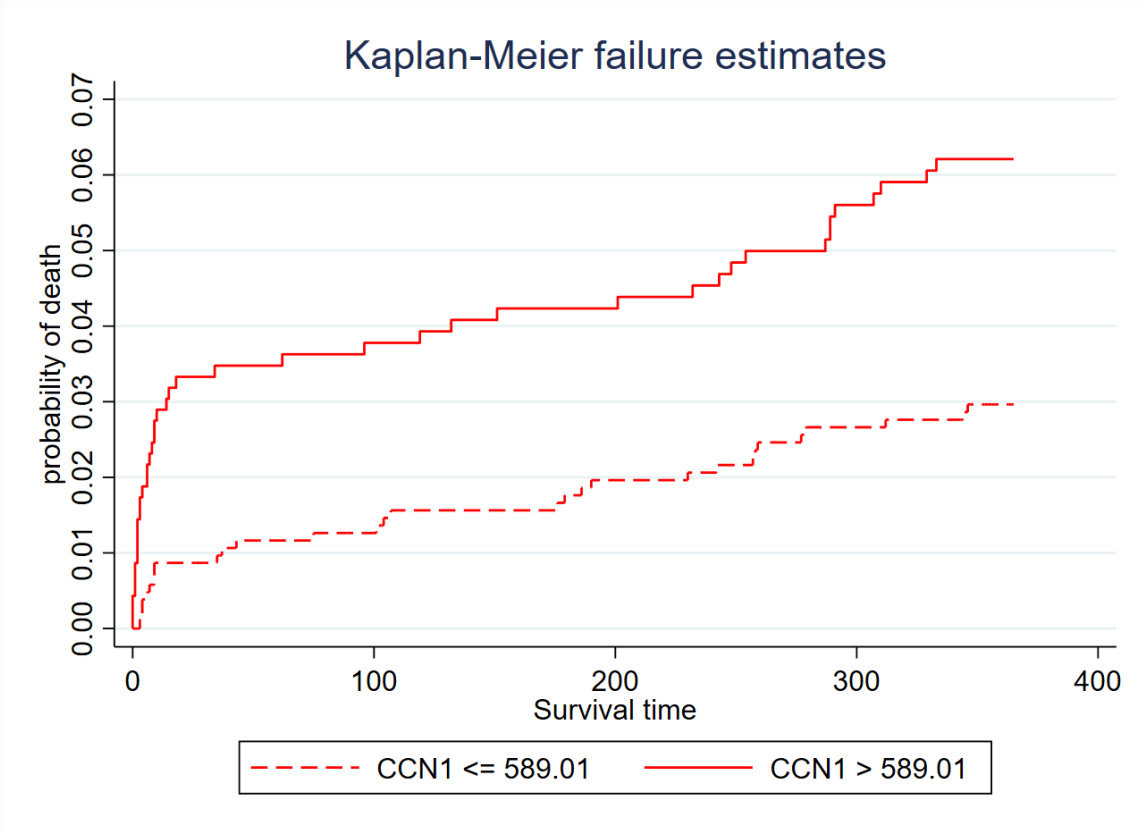

Supplement: JAH3-10-e020488-s001.pdf [file JAH3-10-e020488-s001.pdf]
